# Supplementary material
Source: publisher figshare collection journal article supplement (https://sage.figshare.com/ndownloader/files/24456120)

**Supplemental Figure A1.** Scree plot of explained variance by principal component from principal component analysis.

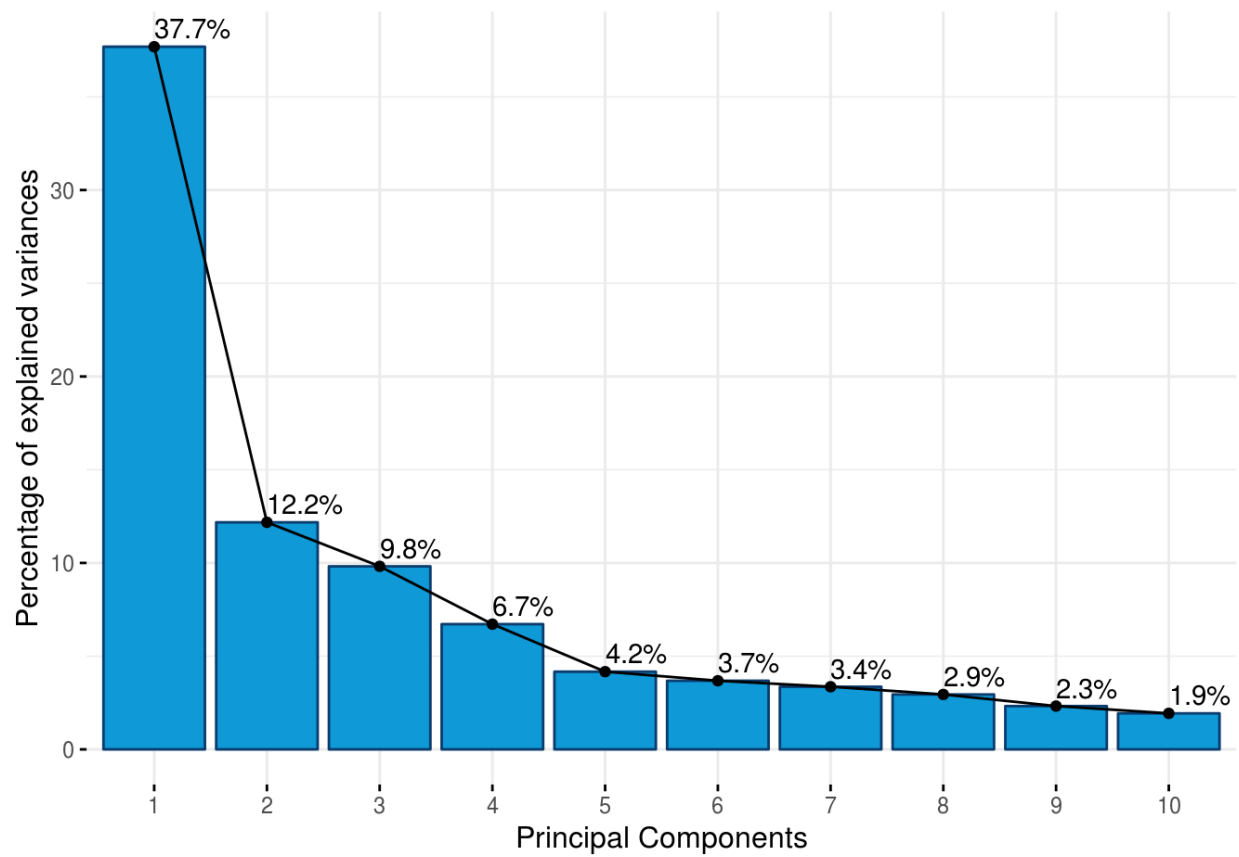

Supplement: Supplementary file 1 [file 24456120]
